# Supplementary material for: Microsatellite Dataset for Cultivar Discrimination in Spring Orchid (Cymbidium goeringii)
Source: MDPI journal article supplement (doi:10.3390/genes14081610), 2023-08-11
Supplement: s1 [file s1]

**Table S1.** Combined genotypes of 12 SSRs observed in *C. goeringii* cultivars

| Cultivars    | CG <sup>1</sup> | Frequency (%) | Genotype of SSR marker <sup>2</sup> |           |       |       |       |        |        |        |        |        |        |           | CMP                     |
|--------------|-----------------|---------------|-------------------------------------|-----------|-------|-------|-------|--------|--------|--------|--------|--------|--------|-----------|-------------------------|
|              |                 |               | CG415                               | CG649     | CG709 | CG722 | CG787 | CG1023 | CG1028 | CG1085 | CG1210 | CG1281 | CG1320 | CG1400    |                         |
| Hwanggeumso  | CG1             | 64.7          | 11-11                               | 15-30.1   | 17-18 | 12-20 | 24-29 | 13-13  | 15-17  | 14-15  | 29-29  | 16-16  | 10-13  | 13.1-20   | 2.369×10 <sup>-15</sup> |
|              | CG2             | 10.7          | 11-13                               | 21-30.1   | 18-18 | 12-20 | 24-24 | 13-13  | 15-15  | 14-19  | 15-29  | 16-16  | 10-13  | 13.1-20   | 7.809×10 <sup>-15</sup> |
| Gwaneum      | CG1             | 57.5          | 11-13                               | 21-30.1   | 18-18 | 12-20 | 24-24 | 13-13  | 15-15  | 14-19  | 15-29  | 16-16  | 10-13  | 13.1-20   | 7.809×10 <sup>-15</sup> |
|              | CG2             | 10.0          | 15-15                               | 14-15     | 17-17 | 12-17 | 24-24 | 13-13  | 17-17  | 15-15  | 15-17  | 8-8    | 7-12   | 13.1-13.1 | 1.346×10 <sup>-14</sup> |
| Boreumdal    | CG1             | 62.0          | 11-20                               | 15-15     | 17-25 | 17-17 | 24-24 | 13-13  | 6-7    | 14-14  | 6-6    | 16-16  | 10-10  | 15-20     | 1.894×10 <sup>-15</sup> |
|              | CG2             | 6.4           | 11-11                               | 21-21     | 17-17 | 12-12 | 24-24 | 20-20  | 17-17  | 14-14  | 17-17  | 10-10  | 7-7    | 20-20     | 4.542×10 <sup>-15</sup> |
| Deungdae     | CG1             | 56.2          | 11-15                               | 16-16     | 17-17 | 12-12 | 24-24 | 13-13  | 7-19   | 14-38  | 15-29  | 16-16  | 12-12  | 20-21     | 1.521×10 <sup>-17</sup> |
|              | CG2             | 8.8           | 10-11                               | 15-21     | 22-25 | 17-17 | 17-17 | 13-20  | 12-12  | 14-17  | 6-6    | 16-16  | 7-7    | 19-19     | 2.693×10 <sup>-19</sup> |
| Manmool      | CG1             | 74.5          | 13-13                               | 15-29.1   | 23-23 | 12-17 | 18-18 | 13-20  | 15-17  | 19-19  | 17-17  | 9-9    | 12-12  | 20-20     | 4.818×10 <sup>-20</sup> |
|              | CG2             | 1.6           | 13-13                               | 15-25.1   | 22-22 | 12-12 | 24-24 | 20-20  | 29-29  | 14-14  | 15-17  | 10-10  | 7-7    | 19-19     | 1.408×10 <sup>-16</sup> |
| Cheonhwangso | CG1A            | 41.0          | 11-19                               | 14-15     | 17-34 | 12-12 | 24-24 | 13-13  | 17-17  | 15-15  | 12-12  | 16-16  | 12-12  | 20-20     | 1.483×10 <sup>-13</sup> |
|              | CG1B            | 29.8          | 11-11                               | 15-29.1   | 17-34 | 12-20 | 24-24 | 13-25  | 17-17  | 16-16  | 17-17  | 16-16  | 7-12   | 13.1-20   | 1.970×10 <sup>-14</sup> |
|              | CG2             | 3.7           | 11-13                               | 21-30.1   | 18-18 | 12-20 | 24-24 | 13-13  | 15-15  | 14-19  | 15-29  | 16-16  | 10-13  | 13.1-20   | 7.809×10 <sup>-15</sup> |
| Daehongbo    | CG1             | 61.8          | 13-22                               | 15-15     | 17-18 | 20-20 | 24-24 | 13-13  | 17-17  | Null   | 15-15  | 16-16  | 7-7    | 19-19     | 8.890×10 <sup>-10</sup> |
|              | CG2             | 6.3           | 13-13                               | 15-15     | 17-25 | 12-13 | 24-24 | 13-18  | 7-7    | 14-14  | 12-12  | 10-16  | 10-10  | 13.1-20   | 4.601×10 <sup>-16</sup> |
| Cheonsoo     | CG1             | 70.6          | 11-13                               | 14-15     | 18-18 | 17-20 | 24-24 | 20-20  | 17-17  | 14-14  | 15-15  | 10-16  | 7-12   | 20-20     | 7.999×10 <sup>-12</sup> |
|              | CG2             | 7.0           | 12-20                               | 17-17     | 18-22 | 11-11 | 23-23 | 17-17  | 16-23  | 14-20  | 14-27  | 29-29  | 12-12  | 23.1-23.1 | 4.192×10 <sup>-33</sup> |
| Cheonjong    | CG1             | 76.0          | 11-11                               | 15-19     | 17-17 | 12-20 | 24-24 | 13-13  | 6-30   | 14-14  | 15-15  | 9-9    | 10-15  | 13.1-20   | 1.742×10 <sup>-14</sup> |
|              | CG2             | 4.0           | 11-13                               | 15-19     | 17-23 | 20-22 | 24-24 | 13-13  | 17-30  | 14-14  | 15-15  | 9-9    | 10-10  | 20-23.1   | 5.161×10 <sup>-15</sup> |
| Hongdaewang  | CG1             | 51.4          | 13-13                               | 15-33.1   | 17-22 | 12-20 | 24-24 | 19-19  | 30-30  | 14-14  | 6-15   | 16-16  | 6-7    | 19-20     | 1.152×10 <sup>-14</sup> |
|              | CG2             | 7.3           | 11-15                               | 23-34.1   | 17-22 | 11-11 | 24-24 | 13-13  | 15-17  | 22-22  | 15-17  | 9-16   | 7-7    | 17-19     | 2.363×10 <sup>-16</sup> |
| Cheonunso    | CG1             | 57.1          | 13-13                               | 15-15     | 18-18 | 30-30 | Null  | 26-26  | 17-17  | 14-14  | 15-15  | 16-16  | 7-7    | 10.1-13.1 | 3.505×10 <sup>-17</sup> |
|              | CG2             | 4.1           | 13-15                               | 15-15     | 17-25 | 12-17 | 24-24 | 13-13  | 17-17  | 14-14  | 15-15  | 16-16  | 6-7    | 19-20     | 6.306×10 <sup>-10</sup> |
| Hwansaeng    | CG1             | 70.5          | 13-13                               | 26.1-30.1 | 18-18 | 11-11 | Null  | 13-13  | 6-12   | 14-15  | 17-29  | 16-16  | 7-9    | 20-20     | 8.045×10 <sup>-16</sup> |
|              | CG2             | 5.3           | 10-11                               | 15-21     | 22-25 | 17-17 | 17-17 | 13-20  | 12-12  | 14-17  | 6-6    | 16-16  | 7-7    | 19-19     | 2.693×10 <sup>-19</sup> |
| Wonmyoung    | CG1             | 91.4          | 11-13                               | 15-15     | 22-22 | 11-12 | 24-24 | 13-20  | 17-17  | 15-15  | 15-15  | 16-16  | 12-12  | 13.1-13.1 | 4.943×10 <sup>-12</sup> |
|              | CG2             | 1.1           | 11-15                               | 25.1-25.1 | 14-24 | 20-27 | Null  | 12-12  | 7-7    | 9-9    | 6-8    | 11-12  | 12-12  | 15-19     | 1.168×10 <sup>-33</sup> |
| Irwohwa      | CG1             | 61.5          | 11-19                               | 15-15     | 17-34 | 12-17 | 22-24 | 13-13  | 15-15  | 14-14  | 15-33  | 9-9    | 7-7    | 19-19     | 1.346×10 <sup>-14</sup> |
|              | CG2             | 11.0          | 15-22                               | 15-15     | 17-22 | 12-12 | 22-22 | 13-13  | 17-30  | 14-15  | 15-15  | 9-17   | 12-12  | 20-20     | 1.151×10 <sup>-13</sup> |
| Taehongso    | CG1             | 73.6          | 11-13                               | 15-20     | 17-17 | 12-20 | 22-22 | 20-20  | 6-6    | 14-14  | 15-28  | 9-16   | 12-12  | 15-15     | 2.074×10 <sup>-17</sup> |
|              | CG2             | 3.3           | 13-22                               | 20-20     | 17-17 | 12-12 | 25-25 | 13-20  | 17-25  | 14-15  | 15-15  | 16-16  | 6-7    | 20-20     | 3.576×10 <sup>-16</sup> |
| Munsubong    | CG1             | 61.9          | 13-13                               | 25.1-29.1 | 17-22 | 12-12 | 22-24 | 20-20  | 15-17  | 14-19  | 12-15  | 16-16  | 7-12   | 13.1-18   | 8.785×10 <sup>-15</sup> |
|              | CG2             | 7.1           | 13-22                               | 14-14     | 16-32 | 17-17 | 18-22 | 13-13  | 17-29  | Null   | 12-15  | 10-16  | 12-12  | 19-19     | 2.557×10 <sup>-17</sup> |
| Agassi       | CG1             | 65.4          | 13-22                               | 15-15     | 17-17 | 12-20 | 24-24 | 13-20  | 15-17  | 16-16  | 6-15   | 10-17  | 7-12   | 19-19     | 1.209×10 <sup>-14</sup> |
|              | CG2             | 9.0           | 12-13                               | 15-29.1   | 12-17 | 11-12 | 22-24 | 13-13  | 15-17  | 14-16  | 17-27  | 9-16   | 7-10   | 19-20     | 2.862×10 <sup>-14</sup> |

|               |      |      |           |           |       |       |       |       |       |       |           |       |       |           |                         |
|---------------|------|------|-----------|-----------|-------|-------|-------|-------|-------|-------|-----------|-------|-------|-----------|-------------------------|
| Geummaek      | CG1  | 77.9 | 13-13     | 15-29.1   | 17-22 | 11-12 | 22-25 | 13-20 | 6-12  | 19-19 | 12-15     | 10-16 | 10-12 | 19-20     | 2.614×10 <sup>-15</sup> |
|               | CG2  | 5.9  | 13-13     | 32.1-32.1 | 24-25 | 12-20 | 18-24 | 13-13 | 15-17 | Null  | 8-15      | 16-16 | 7-12  | 10.1-21   | 4.902×10 <sup>-18</sup> |
| Haeoreum      | CG1  | 80.6 | 11-13     | 14-14     | 25-25 | 11-11 | 25-25 | 20-20 | 17-17 | 14-14 | 17-17     | 9-9   | 7-7   | 13.1-13.1 | 8.255×10 <sup>-17</sup> |
|               | CG2  | 6.0  | 11-22     | 29.1-33.1 | 17-22 | 12-12 | 17-24 | 28-28 | 15-30 | 14-19 | 15-15     | 16-16 | 10-10 | 23.1-23.1 | 8.350×10 <sup>-18</sup> |
| Okro          | CG1  | 89.4 | 11-13     | 15-20     | 17-17 | 12-22 | 24-24 | 13-13 | 7-17  | 14-15 | 12-15     | 16-16 | 6-12  | 13.1-13.1 | 2.567×10 <sup>-12</sup> |
|               | CG2  | 3.0  | 11-18     | 15-15     | 13-18 | 21-21 | 16-16 | 20-20 | 6-26  | 15-15 | 9-15      | 9-26  | 12-12 | 14-23     | 1.993×10 <sup>-27</sup> |
| Sagye         | CG1  | 80.0 | 13-15     | 15-26.1   | 18-26 | 12-12 | 16-22 | 13-25 | 17-30 | 14-15 | 6-17      | 9-16  | 7-12  | 15-15     | 3.772×10 <sup>-18</sup> |
|               | CG2  | 1.5  | 13-15     | 28.1-28.1 | 13-13 | 12-12 | 18-18 | 20-20 | 12-19 | 14-14 | 15-15     | 10-10 | 12-12 | 19-19     | 9.950×10 <sup>-24</sup> |
| Chaeun        | CG1  | 74.6 | 13-13     | 29.1-29.1 | 16-16 | 12-12 | 22-24 | 13-13 | 15-15 | 14-14 | 17-17     | 9-16  | 7-13  | 13.1-20   | 5.165×10 <sup>-15</sup> |
|               | CG2  | 1.7  | 11-13     | 15-25.1   | 17-18 | 11-12 | 24-24 | 13-20 | 17-17 | 14-14 | 6-15      | 9-16  | 7-12  | 19-20     | 5.317×10 <sup>-10</sup> |
| Cheongeumso   | CG1  | 81.0 | 13-19     | 15-29.1   | 17-25 | 12-17 | 24-25 | 13-13 | 17-29 | 14-24 | 15-15     | 16-16 | 7-7   | 13.1-19   | 4.141×10 <sup>-14</sup> |
|               | CG2  | 3.4  | 11-15     | 15-24.1   | 18-34 | 20-22 | 24-25 | 13-20 | 15-15 | 15-20 | 6-29      | 9-16  | 12-13 | 13.1-13.1 | 8.249×10 <sup>-20</sup> |
| Seongyeong    | CG1  | 72.4 | 11-11     | 15-29.1   | 13-17 | 12-20 | 17-24 | 13-13 | 17-17 | 14-14 | 15-29     | 9-16  | 6-6   | 20-20     | 1.282×10 <sup>-13</sup> |
|               | CG2  | 7.0  | 13-19     | 15-15     | 18-22 | 20-22 | 22-22 | 13-13 | 7-17  | 14-14 | 6-17      | 16-17 | 15-15 | 19-19     | 1.524×10 <sup>-17</sup> |
| Wonhongseol   | CG1  | 86.0 | 13-13     | 16-34.1   | 13-17 | 12-17 | 24-24 | 13-20 | 7-17  | 14-19 | 11-17     | 9-9   | 7-7   | 13.1-20   | 6.960×10 <sup>-16</sup> |
|               | CG2  | 3.5  | 11-13     | 13-14     | 16-19 | 14-19 | 14-16 | 10-23 | 6-7   | 11-11 | 9-28      | 11-11 | 5-5   | 18-25     | 1.212×10 <sup>-48</sup> |
| Donglyeon     | CG1  | 60.7 | 15-15     | 15-15     | 17-25 | 12-20 | 22-24 | 13-13 | 15-15 | 14-14 | 15-15     | 16-16 | 12-12 | 20-20     | 6.555×10 <sup>-12</sup> |
|               | CG2  | 5.4  | 13-15     | 20-20     | 22-22 | 12-12 | 24-24 | 13-20 | 7-15  | 14-14 | 15-29     | 9-16  | 7-7   | 19-20     | 1.466×10 <sup>-13</sup> |
| Jinna         | CG1  | 78.2 | 10-13     | 14-29.1   | 18-18 | 11-17 | Null  | 13-13 | 7-7   | 14-14 | 15-15     | 16-16 | 7-7   | 19-19     | 1.674×10 <sup>-12</sup> |
|               | CG2  | 3.6  | 12-22     | 17-17     | 13-19 | 12-22 | 25-25 | 20-20 | 7-7   | 15-15 | 6-29      | 9-10  | 10-12 | 20-28     | 1.067×10 <sup>-24</sup> |
| Jeonju-Hwangu | CG1  | 69.8 | 13-15     | 15-15     | 34-34 | 12-20 | Null  | 13-13 | 7-24  | 14-14 | 12-12     | 16-16 | 7-7   | 15-19     | 2.329×10 <sup>-14</sup> |
|               | CG2  | 18.9 | 13-13     | 14-15     | 17-22 | 22-23 | Null  | 19-19 | 17-17 | 14-14 | 6-6       | 16-16 | 7-12  | 10.1-25   | 1.551×10 <sup>-17</sup> |
| Cheonbulso    | CG1  | 76.9 | 11-19     | 23-26.1   | 25-34 | 20-20 | 24-24 | 13-13 | 30-30 | 14-14 | 15-15     | 16-16 | 12-12 | 20-20     | 5.245×10 <sup>-16</sup> |
|               | CG2  | 5.8  | 13-13     | 25.1-25.1 | 32-32 | 12-12 | 22-22 | 20-20 | 17-17 | 14-14 | 15-15     | 16-16 | 7-7   | 13.1-13.1 | 5.595×10 <sup>-16</sup> |
| Bulkkot       | CG1  | 74.5 | 10-11(10) | 15-15     | 17-17 | 12-12 | 24-24 | 13-13 | 17-17 | Null  | 12-13(14) | 10-16 | 12-12 | 19-19     | 5.094×10 <sup>-13</sup> |
|               | CG2  | 4.3  | 13-13     | 14-25.1   | 17-22 | 12-18 | 24-24 | 13-13 | 7-17  | 9-10  | 16-27     | 16-16 | 10-12 | 23.1-23.1 | 1.583×10 <sup>-20</sup> |
| Hallasan      | CG1A | 47.5 | 11-15     | 15-15     | 17-17 | 17-17 | 24-24 | 13-13 | 12-12 | 14-14 | 17-17     | 10-16 | 10-10 | 13.1-13.1 | 3.031×10 <sup>-14</sup> |
|               | CG1B | 30.0 | 11-11     | 15-15     | 17-17 | 17-17 | 24-24 | 13-13 | 17-17 | 14-14 | 15-17     | 16-16 | 10-10 | 13.1-13.1 | 1.720×10 <sup>-11</sup> |
|               | CG2  | 7.5  | 11-11     | 14-14     | 17-22 | 12-13 | 17-24 | 13-20 | 17-17 | 14-14 | 6-15      | 16-16 | 7-7   | 19-23.1   | 6.909×10 <sup>-14</sup> |
| Cheonsa       | CG1  | 59.0 | 11-13     | 15-25.1   | 17-18 | 11-12 | 24-24 | 13-20 | 17-17 | 14-14 | 6-15      | 9-16  | 7-12  | 19-20     | 5.317×10 <sup>-10</sup> |
|               | CG2  | 12.8 | 12-20     | 17-17     | 18-22 | 11-11 | 23-23 | 17-17 | 16-23 | 14-20 | 14-27     | 25-25 | 12-12 | 23.1-23.1 | 9.337×10 <sup>-35</sup> |
| Susa          | CG1  | 76.3 | 13-22     | 14-20     | 13-22 | 12-17 | 15-22 | 13-13 | 17-17 | 14-15 | 12-15     | 10-16 | 7-7   | 13.1-19   | 3.073×10 <sup>-15</sup> |
|               | CG2  | 7.9  | 11-13     | 29.1-29.1 | 17-17 | 11-17 | 24-24 | 13-25 | 17-17 | 15-15 | 17-17     | 9-16  | 7-10  | 13.1-13.1 | 2.472×10 <sup>-14</sup> |
| Hongwon       | CG1  | 66.7 | 13-13     | 15-15     | 19-22 | 12-20 | 24-24 | 19-19 | 30-30 | 14-14 | 15-29     | 16-16 | 7-7   | 19-19     | 8.215×10 <sup>-15</sup> |
|               | CG2  | 5.6  | 11-13     | 15-15     | 25-25 | 11-11 | Null  | 13-13 | 12-15 | 14-14 | 29-29     | 10-16 | 7-7   | 13.1-13.1 | 2.207×10 <sup>-13</sup> |
| Geumhaso      | CG1  | 75.0 | 11-19     | 14-34.1   | 18-26 | 12-17 | 24-24 | 13-13 | 6-17  | 14-19 | 15-17     | 16-16 | 7-13  | 13.1-20   | 2.886×10 <sup>-15</sup> |
|               | CG2  | 6.3  | 14-15     | 15-33.1   | 26-34 | 11-11 | Null  | 13-13 | 17-17 | 14-14 | 15-15     | 10-10 | 7-13  | 20-20     | 5.273×10 <sup>-17</sup> |
| Honggwiin     | CG1  | 63.3 | 13-13     | 15-34.1   | 22-22 | 12-20 | 24-24 | 13-13 | 7-12  | 14-14 | 17-17     | 16-16 | 10-10 | 13.1-13.1 | 8.121×10 <sup>-14</sup> |
|               | CG2  | 16.7 | 13-22     | Null      | 18-20 | 20-20 | 20-20 | 20-20 | 7-7   | 22-22 | 20-20     | 9-9   | 12-12 | 22-22     | 8.185×10 <sup>-32</sup> |

|                 |     |       |       |           |       |       |       |       |       |       |       |       |       |           |                         |
|-----------------|-----|-------|-------|-----------|-------|-------|-------|-------|-------|-------|-------|-------|-------|-----------|-------------------------|
| Hwangmae        | CG1 | 75.9  | 13-13 | 15-15     | 17-17 | 11-22 | 24-24 | 13-20 | 17-30 | 13-14 | 15-15 | 16-16 | 7-7   | 20-23.1   | 1.223×10 <sup>-11</sup> |
| Migeum          | CG1 | 65.4  | 11-19 | 15-15     | 22-25 | 11-11 | 19-24 | 13-20 | 6-6   | 14-14 | 17-17 | 10-10 | 7-7   | 19-20     | 1.482×10 <sup>-16</sup> |
| Dongcheon       | CG1 | 79.1  | 13-13 | 15-15     | 18-18 | 20-20 | 24-24 | 13-13 | 12-17 | 14-14 | 15-15 | 16-16 | 7-7   | 13.1-13.1 | 7.457×10 <sup>-16</sup> |
| Unmuryeong      | CG1 | 66.7  | 13-13 | 15-29.1   | 16-17 | 11-11 | 17-24 | 13-20 | 12-12 | 14-14 | 12-12 | 16-16 | 10-10 | 19-19     | 1.595×10 <sup>-15</sup> |
| Sacheonwang     | CG1 | 40.9  | 15-15 | 15-15     | 13-13 | 12-12 | 24-24 | 13-13 | 6-7   | 14-14 | 15-15 | 16-16 | 7-13  | 20-20     | 4.429×10 <sup>-13</sup> |
| Songjeong       | CG1 | 75.0  | 11-12 | 19-30.1   | 17-18 | 12-20 | 17-18 | 13-13 | 17-17 | 24-25 | 29-30 | 16-16 | 13-13 | 13.1-20   | 3.106×10 <sup>-24</sup> |
| Wangjungwang    | CG1 | 56.3  | 13-15 | 15-15     | 18-25 | 12-22 | 24-24 | 13-29 | 7-17  | 15-19 | 15-17 | 17-17 | 10-13 | 13.1-20   | 1.167×10 <sup>-17</sup> |
| Hojeong         | CG1 | 53.8  | 11-11 | 15-23     | 13-22 | 11-12 | 24-24 | 13-13 | 16-16 | 14-22 | 15-15 | 9-9   | 12-13 | 13.1-20   | 4.258×10 <sup>-17</sup> |
| Saebyeok        | CG1 | 75.0  | 11-15 | 15-32.1   | 17-18 | 11-22 | 22-24 | 13-13 | 30-30 | 14-14 | 15-15 | 16-16 | 12-12 | 19-20     | 8.840×10 <sup>-14</sup> |
| Taegeukseon     | CG1 | 63.6  | 13-15 | 15-15     | 17-25 | 12-17 | 24-24 | 13-13 | 17-17 | 14-14 | 15-15 | 16-16 | 6-7   | 19-20     | 6.306×10 <sup>-10</sup> |
| Youngchoonso    | CG1 | 81.8  | 15-15 | 14-15     | 17-17 | 12-17 | 24-24 | 13-13 | 17-17 | 15-15 | 15-17 | 8-8   | 7-12  | 13.1-13.1 | 1.346×10 <sup>-14</sup> |
| Geumsusan       | CG1 | 45.5  | 13-22 | 14-14     | 17-17 | 17-20 | 25-25 | 13-13 | 17-17 | 15-15 | 15-17 | 9-9   | 7-7   | 19-19     | 4.971×10 <sup>-15</sup> |
| Jinjusu         | CG1 | 100.0 | 12-13 | 15-29.1   | 12-17 | 11-12 | 22-24 | 13-13 | 15-17 | 14-16 | 17-27 | 9-16  | 7-10  | 19-20     | 2.862×10 <sup>-14</sup> |
| Sinmun          | CG1 | 90.0  | 13-15 | 15-29.1   | 18-18 | 17-23 | 24-24 | 13-13 | 6-17  | 14-14 | 15-17 | 16-16 | 7-7   | 17-20     | 1.078×10 <sup>-12</sup> |
| Sebo            | CG1 | 33.3  | 13-13 | 20-35.1   | 18-34 | 12-22 | 22-22 | 13-13 | 7-18  | 15-15 | 17-28 | 9-16  | 6-7   | 13.1-17   | 1.087×10 <sup>-20</sup> |
| Silla           | CG1 | 100.0 | 11-13 | 20-20     | 17-17 | 12-12 | 24-24 | 20-20 | 17-17 | 14-14 | 15-15 | 16-16 | 7-12  | 13.1-18   | 6.238×10 <sup>-14</sup> |
| Ilchulhwa       | CG1 | 50.0  | 13-13 | 32.1-32.1 | 24-25 | 12-20 | 18-24 | 13-13 | 15-17 | Null  | 8-15  | 16-16 | 7-12  | 10.1-21   | 4.902×10 <sup>-18</sup> |
| Cheongoksan     | CG1 | 100.0 | 16-16 | 14-14     | 19-20 | 11-20 | 12-12 | 13-20 | 6-6   | 8-20  | 13-13 | 10-10 | 7-7   | 20-20     | 4.496×10 <sup>-36</sup> |
| Hongun          | CG1 | 100.0 | 13-13 | 21-21     | 18-18 | 20-20 | 22-24 | 25-25 | 17-17 | 15-15 | 15-15 | 16-16 | 7-13  | 20-20     | 4.016×10 <sup>-17</sup> |
| Jangdan         | CG1 | 66.6  | 11-15 | 23-34.1   | 17-22 | 11-11 | 24-24 | 13-13 | 15-17 | 22-22 | 15-17 | 9-16  | 7-7   | 17-19     | 2.363×10 <sup>-16</sup> |
| Miryeon         | CG1 | 66.7  | 15-22 | 14-15     | 17-22 | 12-12 | 22-22 | 13-13 | 17-30 | 14-15 | 15-15 | 9-17  | 12-12 | 20-20     | 4.636×10 <sup>-14</sup> |
| Geumgangbo      | CG1 | 100.0 | 13-15 | 15-29.1   | 18-18 | 17-23 | 24-24 | 13-13 | 6-17  | 14-14 | 15-17 | 16-16 | 7-7   | 17-20     | 1.078×10 <sup>-12</sup> |
| Hojin           | CG1 | 100.0 | 13-13 | 25.1-25.1 | 16-16 | 11-11 | 25-25 | Null  | 17-17 | 19-19 | 12-15 | 10-16 | 12-12 | 19-19     | 4.440×10 <sup>-18</sup> |
| Hyangsu         | CG1 | 100.0 | 13-22 | 14-14     | 16-32 | 17-17 | 18-22 | 13-13 | 17-29 | Null  | 12-15 | 10-16 | 12-12 | 19-19     | 2.557×10 <sup>-17</sup> |
| Namhaeso        | CG1 | 50.0  | 11-11 | 15-21     | 13-17 | 12-20 | 22-24 | 13-13 | 17-17 | 15-15 | 15-17 | 10-15 | 7-12  | 17-19     | 2.578×10 <sup>-15</sup> |
| Juhongseong     | CG1 | 100.0 | 13-13 | 14-25.1   | 17-22 | 12-18 | 24-24 | 13-13 | 7-17  | Null  | 16-27 | 16-16 | 10-12 | 23.1-23.1 | 1.072×10 <sup>-16</sup> |
| Chanbo          | CG1 | 72.5  | 12-20 | 17-17     | 18-22 | 11-11 | 23-23 | 17-17 | 16-23 | 14-20 | 14-27 | 29-29 | 12-12 | 23.1-23.1 | 4.192×10 <sup>-33</sup> |
| Jilbugeum       | CG1 | 92.9  | 18-18 | 17-17     | 18-18 | 12-12 | 20-25 | 21-28 | 7-23  | 15-15 | 15-15 | 9-9   | 12-12 | 23.1-23.1 | 3.138×10 <sup>-25</sup> |
| Changseongjihwa | CG1 | 92.3  | 20-20 | Null      | 28-28 | 11-11 | 18-18 | 17-17 | 6-6   | 9-14  | 9-27  | 9-9   | 7-12  | 14-23     | 9.962×10 <sup>-29</sup> |
| Hobakjeon       | CG1 | 63.6  | 18-22 | 17-17     | 22-22 | 16-17 | 17-25 | 20-28 | 17-17 | 20-20 | 13-15 | 9-9   | 7-8   | 14-23.1   | 9.868×10 <sup>-28</sup> |
| Sumunsan        | CG1 | 87.5  | 19-19 | Null      | 18-19 | 16-17 | 25-25 | 20-20 | 6-19  | 15-22 | 9-9   | 9-9   | 12-12 | 14-23.1   | 2.083×10 <sup>-25</sup> |
| Hwanguhajeong   | CG1 | 60.0  | 11-15 | 25.1-25.1 | 14-24 | 20-27 | Null  | 12-12 | 7-7   | 9-9   | 6-8   | 11-12 | 12-12 | 15-19     | 1.168×10 <sup>-33</sup> |

<sup>1</sup> CG2 profiles were provided for cultivars with a sample number of 30 or more.

<sup>2</sup> Null: failed loci for genotyping.

Abbreviations: CG: combined genotype, CMP: combined matching probability, SSR: simple sequence repeats.
